# Supplementary material for: Late mortality after sepsis: propensity matched cohort study
Source: PubMed Central journal article supplement — BMJ. 2016 May 17;353:i2375. doi: 10.1136/bmj.i2375 (PMC4869794; doi:10.1136/bmj.i2375), 2016-05-17
Supplement: preh031728.ww1_default.pdf [file preh031728.ww1_default.pdf]

**ONLINE DATA SUPPLEMENT; Late Mortality after Sepsis; a propensity-matched cohort study**

**Appendix1: Process for matching sepsis hospitalizations to non-sepsis infection hospitalizations**  
(the same process is used for matching sepsis hospitalizations to sterile inflammation hospitalizations)

**Step 1: Generate propensity score.**

In this step, 14,529 Health and Retirement participants with linked Medicare claims are used to model the risk of developing sepsis using multiple logistic regression. Each patient's risk of developing sepsis is modeled separately for each of 49,605 two-year intervals following an HRS survey. Missing covariates are imputed with multiple imputation. Each patient's predicted probability of developing sepsis in the next two years is their propensity score for the given 2-year time period.

Dataset unit of observation: HRS survey

| Unique Identifier |                 | Independent Variables to Predict Risk of Sepsis |                   |                       | Dependent Variable | Propensity Score     |                                 |
|-------------------|-----------------|-------------------------------------------------|-------------------|-----------------------|--------------------|----------------------|---------------------------------|
| Patient           | HRS Survey Year | HRS Survey Date                                 | Age at HRS Survey | Self-Rating of Health | Other Covariates   | Sepsis in Next 2 yrs | Predicted Probability of Sepsis |
| A                 | 1998            | 1-Apr-98                                        | 68                | 4                     |                    | 0                    | 1.8%                            |
| A                 | 2000            | 15-Mar-00                                       | 70                | 4                     |                    | 0                    | 2.2%                            |
| A                 | 2002            | 3-Mar-02                                        | 72                | 3                     |                    | 1                    | 2.5%                            |
| B                 | 2000            | 4-Jun-00                                        | 65                | 4                     |                    | 0                    | 5.3%                            |
| B                 | 2002            | 5-May-02                                        | 67                | 3                     |                    | 0                    | 12.1%                           |
| B                 | 2004            | 16-May-04                                       | 69                | 3                     |                    | 0                    | 13.4%                           |
| B                 | 2006            | 7-Apr-06                                        | 71                | 2                     |                    | 0                    | 14.2%                           |
| C                 | 2000            | 1-Apr-02                                        | 73                | 2                     |                    | 0                    | 6.5%                            |
| C                 | 2002            | 16-Apr-00                                       | 75                | 2                     |                    | 1                    | 12.1%                           |
| C                 | 2004            | 9-Jun-04                                        | 66                | 4                     |                    | 0                    | 17.8%                           |
| C                 | 2006            | 10-May-06                                       | 68                | 4                     |                    | 1                    | 18.8%                           |
| C                 | 2008            | 11-Mar-08                                       | 69                | 3                     |                    | 0                    | 22.5%                           |
| D                 | 1998            | 2-May-98                                        | 73                | 3                     |                    | 0                    | 2.1%                            |
| D                 | 2000            | 13-Apr-00                                       | 75                | 3                     |                    | 0                    | 2.3%                            |
| D                 | 2002            | 28-Apr-02                                       | 77                | 2                     |                    | 0                    | 5.6%                            |

**Step 2: Identify Hospitalizations for Possible Inclusion in Matched Analysis.**

In this step, the data is reformatted such that row of data represents one hospitalization. Data from the HRS survey immediately prior to the hospitalization is linked to each hospitalization. Hospitalizations are classified as being for sepsis, infection, sterile inflammation, or none of these conditions. Next, the hospitalizations are sorted by person and date. The first hospitalization after each HRS survey is included, while all other hospitalizations are excluded. Hospitalizations that are not for any of the conditions of interest are also excluded.

Dataset unit of observation: Hospitalization

| Patient | HRS Survey Year | HRS Survey Date | Admission Date | Sepsis | Infection | Sterile Inflammation | Predicted Probability of Sepsis |
|---------|-----------------|-----------------|----------------|--------|-----------|----------------------|---------------------------------|
| A       | 1998            | 1-Apr-98        | 1-Jan-99       | 0      | 0         | 0                    | 1.80%                           |
| A       | 2000            | 15-Mar-00       | 15-Jan-01      | 0      | 1         | 0                    | 2.20%                           |
| A       | 2002            | 3-Mar-02        | 21-Apr-02      | 1      | 0         | 0                    | 2.50%                           |
| A       | 2002            | 4-Mar-02        | 10-Nov-03      | 1      | 0         | 0                    | 2.50%                           |
| B       | 2002            | 5-May-02        | 11-Feb-04      | 0      | 1         | 0                    | 12.10%                          |
| B       | 2004            | 16-May-04       | 12-Nov-05      | 0      | 0         | 1                    | 13.40%                          |
| B       | 2006            | 7-Apr-06        | 13-Nov-06      | 0      | 0         | 0                    | 14.20%                          |
| B       | 2006            | 7-Apr-06        | 14-Dec-06      | 1      | 0         | 0                    | 14.20%                          |

These hospitalizations are excluded because they are not first hospitalizations after an HRS survey

This hospitalization is excluded because it is not for sepsis, infection, or sterile inflammation

**ONLINE DATA SUPPLEMENT; Late Mortality after Sepsis; a propensity-matched cohort study**

**Process for matching sepsis to non-sepsis infection and sepsis to sterile inflammation, continued**

**Step 3:** Remove duplicate hospitalizations per individual.

In this step, we make a dataset of sepsis hospitalization and a dataset of infection hospitalization. So that no patient is included in the comparison of sepsis to infection more than once, exclude (at random) duplicate hospitalizations from the Sepsis and Infection datasets.

**Sepsis Hospitalizations**

| Patient      | HRS Survey Year | Sepsis Propensity |
|--------------|-----------------|-------------------|
| A            | 2002            | 2.5%              |
| C            | 2004            | 17.8%             |
| <del>C</del> | <del>2006</del> | <del>18.8%</del>  |
| D            | 2002            | 5.6%              |
| E            | 2008            | 11.2%             |
| F            | 2004            | 14.2%             |
| G            | 2008            | 16.5%             |
| H            | 2002            | 12.1%             |
| <del>I</del> | <del>2005</del> | <del>14.9%</del>  |
| O            | 2007            | 9.6%              |
| Q            | 1998            | 13.4%             |

**Infection Hospitalizations**

| Patient      | HRS Survey Year | Sepsis Propensity |
|--------------|-----------------|-------------------|
| B            | 2004            | 13.4%             |
| I            | 2000            | 3.4%              |
| J            | 2007            | 14.2%             |
| K            | 2000            | 11.2%             |
| J            | 2002            | 2.5%              |
| M            | 2003            | 17.8%             |
| N            | 2004            | 16.5%             |
| <del>N</del> | <del>2006</del> | <del>18.9%</del>  |
| <del>N</del> | <del>2008</del> | <del>22.1%</del>  |
| P            | 2007            | 5.6%              |
| R            | 2006            | 9.6%              |

*This hospitalization is excluded at random because patient C has two sepsis hospitalizations*

*This hospitalization is excluded at random because patient I has both a sepsis and a non-sepsis infection hospitalization*

*These two hospitalizations are excluded at random because patient O has three non-sepsis infection hospitalizations*

**Step 4:** Match Sepsis and Infection Hospitalizations.

Sort hospitalizations by sepsis propensity, then match sepsis and non-sepsis infection hospitalizations by age, gender, and propensity for developing sepsis. Continue matching until no more hospitalizations can be matched to each other.

**Sepsis Hospitalizations**

| Patient | HRS Survey Year | Sepsis Propensity |
|---------|-----------------|-------------------|
| A       | 2002            | 2.5%              |
| D       | 2002            | 5.6%              |
| O       | 2007            | 9.6%              |
| E       | 2008            | 11.2%             |
| H       | 2002            | 12.1%             |
| Q       | 1998            | 13.4%             |
| F       | 2004            | 14.2%             |
| G       | 2008            | 16.5%             |
| C       | 2004            | 17.8%             |

**Infection Hospitalizations**

| Patient | HRS Survey Year | Sepsis Propensity |
|---------|-----------------|-------------------|
| J       | 2002            | 2.5%              |
| P       | 2007            | 5.6%              |
| R       | 2006            | 9.6%              |
| K       | 2000            | 11.2%             |
| I       | 2000            | 12.1%             |
| B       | 2004            | 13.4%             |
| J       | 2007            | 14.2%             |
| N       | 2004            | 16.5%             |
| M       | 2003            | 17.8%             |
