# Supplementary material for: Late mortality after sepsis: propensity matched cohort study
Source: PubMed Central journal article supplement — BMJ. 2016 May 17;353:i2375. doi: 10.1136/bmj.i2375 (PMC4869794; doi:10.1136/bmj.i2375), 2016-05-17
Supplement: preh031728.ww5_default.pdf [file preh031728.ww5_default.pdf]

**eTable A:** Definitions of Sepsis and the three Comparison Cohorts

|                                         |                                                                                                                                                                                                                                                                                                                                                                                                                                                                                                                                                                                                                                                                                                                                                                                                                                                                                                                                                                                                                                                                                                                                                                                                                                                                                                                                                                                                                   |
|-----------------------------------------|-------------------------------------------------------------------------------------------------------------------------------------------------------------------------------------------------------------------------------------------------------------------------------------------------------------------------------------------------------------------------------------------------------------------------------------------------------------------------------------------------------------------------------------------------------------------------------------------------------------------------------------------------------------------------------------------------------------------------------------------------------------------------------------------------------------------------------------------------------------------------------------------------------------------------------------------------------------------------------------------------------------------------------------------------------------------------------------------------------------------------------------------------------------------------------------------------------------------------------------------------------------------------------------------------------------------------------------------------------------------------------------------------------------------|
| <b>Sepsis</b>                           | Patients whose first hospitalization after HRS survey was for sepsis, defined as a hospitalization with an ICD-9-CM code for infection and an ICD-9-CM code for acute organ dysfunction (785.5 “shock without trauma”; 458 “hypotension”; procedural code 96.7 “mechanical ventilation”; 348.3 “encephalopathy”; 293 “transient organic psychosis”; 348.1 “anoxic brain injury”; 287.4 “secondary thrombocytopenia”; 287.5 “thrombocytopenia, unspecified”; 286.9 “other/unspecified coagulation defect”; 286.6 “defibrination syndrome”; 570 “acute and subacute necrosis of liver”; 573.4 “hepatic infarction”; 584 “acute renal failure”) or an explicit ICD-9-CM code for severe sepsis (995.92) or septic shock (785.52).                                                                                                                                                                                                                                                                                                                                                                                                                                                                                                                                                                                                                                                                                    |
| <b>Not Currently Hospitalized Adult</b> | All patients were considered in this category for each consecutive day that they were alive and not hospitalized following HRS survey.                                                                                                                                                                                                                                                                                                                                                                                                                                                                                                                                                                                                                                                                                                                                                                                                                                                                                                                                                                                                                                                                                                                                                                                                                                                                            |
| <b>Non-sepsis infection</b>             | Patients whose first hospitalization after HRS survey was for a non-sepsis infection, defined as a hospitalization with an ICD-9-CM code for infection included in the definition of sepsis, but without an ICD-9-CM code for acute organ dysfunction.                                                                                                                                                                                                                                                                                                                                                                                                                                                                                                                                                                                                                                                                                                                                                                                                                                                                                                                                                                                                                                                                                                                                                            |
| <b>Sterile Inflammatory Condition</b>   | Patients whose first hospitalization after HRS survey was for a sterile inflammatory condition, defined as a Healthcare Cost and Utilization Project clinical classification software single-level diagnosis categories 144, 202, 210, 225-236, 239, 240, 244, 249: “regional enteritis and ulcerative colitis”, “rheumatoid arthritis and related disease”, “systemic lupus erythematosus and other connective tissue disorders”, “joint disorders and dislocations; trauma-related”, “fracture of the neck of the femur”, “spinal cord injury”, “skull and face fractures”, “fracture of the upper limb”, “fracture of the lower limb”, “other fractures”, “sprains and strains”, “intracranial injury”, “crushing injury or internal injury”, open wounds of the head, neck, and trunk”, “open wounds of the extremities”, “superficial injury; contusion”, “burns”, “other injuries due to external causes”, or “shock” with no secondary ICD-9-CM codes for either infection or sepsis; or principal ICD-9-CM code 577.0 “acute pancreatitis”, 958.x (various specified traumatic injuries), 959.x “other and unspecified injuries”, 995.94 “systemic inflammatory response due to noninfectious process without acute organ dysfunction”, 995.94 “systemic inflammatory response due to noninfectious process with acute organ dysfunction” and no secondary ICD-9-CM codes for either infection or sepsis. |

**eTable B:** Covariate Balance Between Matched Sepsis and Non-Hospitalized Cohorts

|                                                             | <b>Sepsis<br/>(N=777)</b> | <b>Not Currently<br/>Hospitalized<br/>(N=777)</b> | <b>p</b> |
|-------------------------------------------------------------|---------------------------|---------------------------------------------------|----------|
| <b>Demographics</b>                                         |                           |                                                   |          |
| Age, years, mean (SD)                                       | 78.7 (8.2)                | 78.2 (8.1)                                        | 0.99     |
| Male, N (%)                                                 | 358 (46.1%)               | 358 (46.1%)                                       | 1.00     |
| Race, N (%)                                                 |                           |                                                   | 0.89     |
| White/Caucasian                                             | 629 (81.0%)               | 623 (80.2%)                                       |          |
| Black/African American                                      | 133 (17.1%)               | 140 (18.0%)                                       |          |
| Other                                                       | 15 (1.9%)                 | 14 (1.8%)                                         |          |
| Hispanic, N (%)                                             | 61 (7.9%)                 | 55 (7.1%)                                         | 0.56     |
| Married or partnered, N (%)                                 | 345 (45.0%)               | 350 (45.0%)                                       | 0.80     |
| <b>Economic Status</b>                                      |                           |                                                   |          |
| Total Wealth                                                |                           |                                                   | 0.99     |
| Quintile 5 positive assets                                  | 102 (13.1%)               | 101 (13.0%)                                       |          |
| Quintile 4 positive assets                                  | 112 (14.4%)               | 111 (14.3%)                                       |          |
| Quintile 3 positive assets                                  | 126 (16.2%)               | 124 (16.0%)                                       |          |
| Quintile 2 positive assets                                  | 159 (20.5%)               | 151 (19.4%)                                       |          |
| Quintile 1 positive assets                                  | 196 (25.2%)               | 205 (26.4%)                                       |          |
| Net negative or zero assets                                 | 82 (10.6%)                | 85 (10.9%)                                        |          |
| Government Assistance                                       | 65 (8.4%)                 | 63 (8.1%)                                         | 0.55     |
| <b>Health Status</b>                                        |                           |                                                   |          |
| Charlson co-morbidity Index, median (IQR)                   | 2 (0-4)                   | 2 (0-4)                                           | 0.84     |
| Congestive Heart Failure                                    | 165 (21.2%)               | 157 (20.2%)                                       | 0.62     |
| Diabetes without Complications                              | 194 (25.0%)               | 227 (29.2%)                                       | 0.06     |
| Diabetes with Complications                                 | 75 (9.7%)                 | 62 (8.0%)                                         | 0.25     |
| Dementia                                                    | 44 (5.7%)                 | 34 (4.4%)                                         | 0.25     |
| Moderate or severe liver disease                            | 4 (0.5%)                  | 3 (0.4%)                                          | 0.71     |
| Cancer                                                      | 84 (10.8%)                | 94 (12.1%)                                        | 0.43     |
| Renal disease                                               | 77 (9.9%)                 | 61 (7.9%)                                         | 0.15     |
| Connective tissue disease                                   | 30 (3.9%)                 | 25 (3.2%)                                         | 0.49     |
| I/ADL limitations, median (IQR)                             | 1 (0-4)                   | 1 (0-3)                                           | 0.08     |
| Self-Rating of Health, N (%)                                |                           |                                                   | 0.68     |
| Excellent                                                   | 24 (3.1%)                 | 20 (2.6%)                                         |          |
| Very Good                                                   | 106 (13.6%)               | 113 (14.5%)                                       |          |
| Good                                                        | 216 (27.8%)               | 203 (26.1%)                                       |          |
| Fair                                                        | 244 (31.4%)               | 264 (34.0%)                                       |          |
| Poor                                                        | 187 (24.1%)               | 176 (22.7%)                                       |          |
| Body Mass Index, N (%)                                      |                           |                                                   | 0.24     |
| Very Severely Obese                                         | 24 (3.1%)                 | 21 (2.7%)                                         |          |
| Severely Obese                                              | 35 (4.5%)                 | 37 (4.8%)                                         |          |
| Obese                                                       | 94 (12.1%)                | 103 (13.3%)                                       |          |
| Overweight                                                  | 273 (35.1%)               | 237 (30.5%)                                       |          |
| Normal                                                      | 301 (38.7%)               | 306 (39.4%)                                       |          |
| Underweight                                                 | 41 (5.3%)                 | 63 (8.1%)                                         |          |
| <b>Healthcare Use</b>                                       |                           |                                                   |          |
| Hospitalizations in prior year, median (IQR)                | 0 (0-1)                   | 0 (0-1)                                           | 0.11     |
| Sepsis in prior year, N (%)                                 | 24 (3.1%)                 | 24 (3.1%)                                         | 1.00     |
| Residence in a nursing home, N (%)                          | 85 (10.9%)                | 72 (9.3%)                                         | 0.27     |
| <b>Other</b>                                                |                           |                                                   |          |
| Days from HRS survey to index hospitalization, median (IQR) | 291 (127-486)             | 294 (133-490)                                     | 0.70     |
| Risk of developing sepsis (Propensity Score), median (IQR)  | 5.3%(2.9%-10.7%)          | 5.3% (3.0%-10.6%)                                 | 0.11     |

I/ADL, activities and instrumental activities of daily living.

**eTable C: Covariate Balance Between Matched Sepsis and Non-sepsis infection Cohorts**

|                                                             | <b>Sepsis<br/>(N=788)</b> | <b>Non-sepsis<br/>infection<br/>(N=788)</b> | <b>p</b> |
|-------------------------------------------------------------|---------------------------|---------------------------------------------|----------|
| <b>Demographics</b>                                         |                           |                                             |          |
| Age, years, mean (SD)                                       | 80.1 (8.1)                | 80.1 (8.1)                                  | 0.89     |
| Male, N (%)                                                 | 363 (46.1%)               | 363 (46.1%)                                 | 1.00     |
| Race, N (%)                                                 |                           |                                             | 0.19     |
| White/Caucasian                                             | 631 (80.1%)               | 654 (83.0%)                                 |          |
| Black/African American                                      | 146 (18.5%)               | 126 (15.2%)                                 |          |
| Other                                                       | 11 (1.4%)                 | 14 (1.8%)                                   |          |
| Hispanic, N (%)                                             | 56 (7.1%)                 | 65 (8.3%)                                   | 0.39     |
| Married or partnered, N (%)                                 | 358 (45.4%)               | 338 (42.9 %)                                | 0.31     |
| <b>Economic Status</b>                                      |                           |                                             |          |
| Total Wealth                                                |                           |                                             | 0.37     |
| Quintile 5 positive assets                                  | 107 (13.6%)               | 92 (11.7%)                                  |          |
| Quintile 4 positive assets                                  | 111 (14.1%)               | 103 (13.1%)                                 |          |
| Quintile 3 positive assets                                  | 124 (15.7%)               | 142 (18.0%)                                 |          |
| Quintile 2 positive assets                                  | 158 (20.1%)               | 149 (18.9%)                                 |          |
| Quintile 1 positive assets                                  | 204 (25.9%)               | 197 (25.0%)                                 |          |
| Net negative or zero assets                                 | 84 (10.7%)                | 105 (13.3%)                                 |          |
| Government Assistance                                       | 69 (8.8%)                 | 70 (8.9%)                                   | 0.48     |
| <b>Health Status</b>                                        |                           |                                             |          |
| Charlson co-morbidity Index, median (IQR)                   | 2 (0-4)                   | 2 (0-4)                                     | 0.47     |
| Congestive Heart Failure                                    | 169 (21.5%)               | 163 (20.7%)                                 | 0.71     |
| Diabetes without Complications                              | 200 (25.4%)               | 226 (28.7%)                                 | 0.14     |
| Diabetes with Complications                                 | 69 (8.8%)                 | 59 (7.5%)                                   | 0.36     |
| Dementia                                                    | 49 (6.2%)                 | 49 (6.2%)                                   | 1.00     |
| Moderate or severe liver disease                            | 4 (0.5%)                  | 1 (0.1%)                                    | 0.18     |
| Cancer                                                      | 94 (11.9%)                | 101 (12.8%)                                 | 0.59     |
| Renal disease                                               | 67 (8.5%)                 | 67 (8.5%)                                   | 1.00     |
| Connective tissue disease                                   | 28 (3.6%)                 | 32 (4.1%)                                   | 0.60     |
| I/ADL limitations, median (IQR)                             | 1 (0-4)                   | 1 (0-5)                                     | 0.28     |
| Self-Rating of Health, N (%)                                |                           |                                             | 0.85     |
| Excellent                                                   | 24 (3.0%)                 | 30 (3.8%)                                   |          |
| Very Good                                                   | 99 (12.6%)                | 100 (12.7%)                                 |          |
| Good                                                        | 206 (26.1%)               | 212 (26.9%)                                 |          |
| Fair                                                        | 259 (32.9%)               | 242 (30.7%)                                 |          |
| Poor                                                        | 200 (25.4%)               | 204 (25.9%)                                 |          |
| Body Mass Index, N (%)                                      |                           |                                             | 0.76     |
| Very Severely Obese                                         | 23 (2.9%)                 | 25 (3.2%)                                   |          |
| Severely Obese                                              | 38 (4.8%)                 | 36 (4.6%)                                   |          |
| Obese                                                       | 107 (13.6%)               | 100 (12.7%)                                 |          |
| Overweight                                                  | 229 (29.1%)               | 247 (31.4%)                                 |          |
| Normal                                                      | 314 (39.9%)               | 320 (40.6%)                                 |          |
| Underweight                                                 | 65 (8.3%)                 | 49 (6.2%)                                   |          |
| <b>Healthcare Use</b>                                       |                           |                                             |          |
| Hospitalizations in prior year, median (IQR)                | 0 (0-1)                   | 0 (0-1)                                     | 0.17     |
| Sepsis in prior year, N (%)                                 | 35 (4.4%)                 | 31 (3.9%)                                   | 0.62     |
| Residence in a nursing home, N (%)                          | 92 (11.7%)                | 109 (13.8%)                                 | 0.20     |
| <b>Other</b>                                                |                           |                                             |          |
| Days from HRS survey to index hospitalization, median (IQR) | 295 (127-482)             | 224 (117-453)                               | 0.03     |
| Risk of developing sepsis (Propensity Score), median (IQR)  | 5.6% (3.1%-11.4%)         | 5.7% (3.1%-11.1%)                           | 0.86     |

I/ADL, activities and instrumental activities of daily living.

**eTable D:** Covariate Balance Between Matched Sepsis and Sterile Inflammation Cohorts

|                                                             | <b>Sepsis<br/>(N=504)</b> | <b>Sterile<br/>Inflammation<br/>(N=504)</b> | <b>p</b> |
|-------------------------------------------------------------|---------------------------|---------------------------------------------|----------|
| <b>Demographics</b>                                         |                           |                                             |          |
| Age, years, mean ± SD                                       | 81.0 (8.0)                | 81.1 (8.1)                                  | 0.83     |
| Male, N (%)                                                 | 194 (38.5%)               | 194 (38.5%)                                 | 1.00     |
| Race, N (%)                                                 |                           |                                             | 0.21     |
| White/Caucasian                                             | 464 (92.1%)               | 464 (92.1%)                                 |          |
| Black/African American                                      | 38 (7.5%)                 | 33 (6.6%)                                   |          |
| Other                                                       | 2 (0.4%)                  | 7 (1.4%)                                    |          |
| Hispanic, N (%)                                             | 35 (6.9%)                 | 46 (9.1%)                                   | 0.20     |
| Married or partnered, N (%)                                 | 224 (44.2%)               | 228 (45.2%)                                 | 0.80     |
| <b>Economic Status</b>                                      |                           |                                             |          |
| Total Wealth                                                |                           |                                             | 0.62     |
| Quintile 5 positive assets                                  | 74 (14.7%)                | 76 (15.1%)                                  |          |
| Quintile 4 positive assets                                  | 91 (18.1%)                | 72 (14.3%)                                  |          |
| Quintile 3 positive assets                                  | 90 (17.9%)                | 102 (20.2%)                                 |          |
| Quintile 2 positive assets                                  | 92 (18.3%)                | 95 (18.9%)                                  |          |
| Quintile 1 positive assets                                  | 112 (22.2%)               | 119 (23.6%)                                 |          |
| Net negative or zero assets                                 | 45 (8.9%)                 | 40 (7.9%)                                   |          |
| Government Assistance                                       | 34 (6.8%)                 | 29 (5.8%)                                   | 0.62     |
| <b>Health Status</b>                                        |                           |                                             |          |
| Charlson co-morbidity Index, median (IQR)                   | 2 (0-3)                   | 2 (0-3)                                     | 0.12     |
| I/ADL limitations, median (IQR)                             | 1 (0-3)                   | 1 (0-4)                                     | 0.87     |
| Congestive Heart Failure                                    | 86 (17.1%)                | 79 (15.7%)                                  | 0.55     |
| Diabetes without Complications                              | 116 (23.0%)               | 108 (21.4%)                                 | 0.54     |
| Diabetes with Complications                                 | 37 (7.3%)                 | 31 (6.2%)                                   | 0.45     |
| Dementia                                                    | 26 (5.2%)                 | 28 (5.6%)                                   | 0.78     |
| Moderate or severe liver disease                            | 2 (0.4%)                  | 1 (0.4%)                                    | 0.56     |
| Cancer                                                      | 57 (11.3%)                | 46 (9.1%)                                   | 0.25     |
| Renal disease                                               | 38 (7.5%)                 | 31 (6.2%)                                   | 0.38     |
| Connective tissue disease                                   | 30 (6.0%)                 | 17 (4.5%)                                   | 0.05     |
| Self-Rating of Health, N (%)                                |                           |                                             | 0.71     |
| Excellent                                                   | 19 (3.8%)                 | 13 (2.6%)                                   |          |
| Very Good                                                   | 74 (14.7%)                | 85 (16.9%)                                  |          |
| Good                                                        | 150 (29.8%)               | 149 (29.6%)                                 |          |
| Fair                                                        | 160 (31.8%)               | 155 (30.8%)                                 |          |
| Poor                                                        | 101 (20.9%)               | 101 (20.4%)                                 |          |
| Body Mass Index, N (%)                                      |                           |                                             | 0.13     |
| Very Severely Obese                                         | 3 (0.6%)                  | 5 (1.0%)                                    |          |
| Severely Obese                                              | 7 (1.4%)                  | 5 (1.0%)                                    |          |
| Obese                                                       | 45 (8.9%)                 | 76 (15.5%)                                  |          |
| Overweight                                                  | 164 (32.5%)               | 154 (30.6%)                                 |          |
| Normal                                                      | 244 (48.4%)               | 226 (44.8%)                                 |          |
| Underweight                                                 | 40 (7.9%)                 | 37 (7.3%)                                   |          |
| <b>Healthcare Use</b>                                       |                           |                                             |          |
| Hospitalizations in prior year, median (IQR)                | 0 (0-1)                   | 0 (0-1)                                     | 0.55     |
| Sepsis in prior year, N (%)                                 | 13 (2.6%)                 | 10 (2.0%)                                   | 0.53     |
| Residence in a nursing home, N (%)                          | 60 (10.5%)                | 50 (8.7%)                                   | 0.32     |
| <b>Other</b>                                                |                           |                                             |          |
| Days from HRS survey to index hospitalization, median (IQR) | 302.5 (130-448.5)         | 270.5 (103.5-454)                           | 0.04     |
| Risk of developing sepsis (Propensity Score), median (IQR)  | 4.7% (2.7%-8.2%)          | 5.0% (2.8%-8.3%)                            | 0.50     |

I/ADL, activities and instrumental activities of daily living.

**eTable E:** Adjusted rates of mortality versus comparisons by time period

| <b>Time Period</b>         | <b>Sepsis versus Not Currently Hospitalized</b><br>(Adjusted Percentages <sup>a</sup> )<br>(Sepsis 95% CI)<br>(Non-Hosp. 95% CI) | <b>Sepsis versus Non-sepsis infection</b><br>(Adjusted Percentages <sup>a</sup> )<br>(Sepsis 95% CI)<br>(Infection 95% CI) | <b>Sepsis versus Sterile Inflammation</b><br>(Adjusted Percentages <sup>a</sup> )<br>(Sepsis 95% CI)<br>(Sterile Inflammation 95% CI) |
|----------------------------|----------------------------------------------------------------------------------------------------------------------------------|----------------------------------------------------------------------------------------------------------------------------|---------------------------------------------------------------------------------------------------------------------------------------|
| <b>0 - 30 day</b>          | <b>26.2% versus 0.8%</b><br>(23.2%-29.3%)<br>(0.2%-1.3%)                                                                         | <b>26.0% versus 7.1%</b><br>(22.9%-29.0%)<br>(5.4%-8.9%)                                                                   | <b>24.4% versus 4.8%</b><br>(20.5%-27.9%)<br>(2.9%-6.6%)                                                                              |
| <b>31 - 90 day</b>         | <b>12.1% versus 1.4%</b><br>(9.4%-14.7%)<br>(0.6%-2.3%)                                                                          | <b>14.3% versus 6.4%</b><br>(11.6%-17.2%)<br>(4.6%-8.1%)                                                                   | <b>15.1% versus 4.8%</b><br>(11.5%-18.6%)<br>(2.9%-6.6%)                                                                              |
| <b>91-180 day</b>          | <b>9.6% versus 2.6%</b><br>(7.0%-12.1%)<br>(1.5%-3.7%)                                                                           | <b>9.8% versus 5.8%</b><br>(7.2%-12.4%)<br>(4.0%-7.5%)                                                                     | <b>9.5% versus 5.3%</b><br>(6.3%-12.8%)<br>(3.4%-7.3%)                                                                                |
| <b>181 day – 1 year</b>    | <b>11.6% versus 4.2%</b><br>(8.7%-14.5%)<br>(2.8%-5.6%)                                                                          | <b>12.8% versus 9.0%</b><br>(9.7%-15.8%)<br>(6.4%-10.5%)                                                                   | 11.4% versus 7.3%<br>(7.8%-15.0%)<br>(4.9%-9.7%)                                                                                      |
| <b>&gt;1 year – 2 year</b> | <b>16.0% versus 10.7%</b><br>(12.5%-19.5%)<br>(8.6%-12.9%)                                                                       | 15.7% versus 16.1%<br>(12.1%-19.0%)<br>(13.2%-19.2%)                                                                       | 17.0% versus 13.1%<br>(10.9%-16.3%)<br>(12.5%-21.5%)                                                                                  |
| <b>31 day – 2 year</b>     | <b>40.4% versus 18.3%</b><br>(36.5%-44.2%)<br>(15.7%-20.8%)                                                                      | <b>42.8% versus 32.4%</b><br>(39.0%-46.7%)<br>(29.2%-46.7%)                                                                | <b>43.5% versus 27.3%</b><br>(38.8%-48.2%)<br>(23.7%-30.9%)                                                                           |

<sup>a</sup>Adjusted for age, gender, and propensity for sepsis, which includes age, race, ethnicity, gender, partnership, wealth, food stamp use, Charlson co-morbidity index, I/ADL limitations, self rating of health, body mass index, hospitalizations in the prior year, sepsis in the prior year, and residence in a nursing home. Statistically significant results are presented in bold. Conceptually, this table reports the overall matched cohort's mortality if everyone had a sepsis hospitalization versus if everyone had the comparison condition.

**eTable F:** Rates of readmission among those who survived to discharge, by matched cohort

|                    | <b>Sepsis</b>              | <b>Not currently hospitalized*</b> | <b><i>p</i></b> |
|--------------------|----------------------------|------------------------------------|-----------------|
| 30-day readmission | <b>25.7%</b> (22.4%-29.3%) | <b>4.2%</b> (3.0%-5.9%)            | <0.001          |
| 90-day readmission | <b>38.0%</b> (34.3%-41.9%) | <b>10.6%</b> (8.6%-12.9%)          | <0.001          |
| 1-year readmission | <b>58.1%</b> (54.2%-62.0%) | <b>29.3%</b> (26.2%-32.7%)         | <0.001          |

|                    | <b>Sepsis</b>              | <b>Infection</b>           | <b><i>p</i></b> |
|--------------------|----------------------------|----------------------------|-----------------|
| 30-day readmission | <b>24.6%</b> (21.4%-28.2%) | <b>16.7%</b> (14.1%-19.5%) | <0.001          |
| 90-day readmission | <b>35.8%</b> (32.2%-39.6%) | <b>27.2%</b> (24.2%-30.5%) | <0.001          |
| 1-year readmission | <b>55.9%</b> (52.0%-59.7%) | <b>52.2%</b> (48.7%-55.7%) | 0.16            |

|                    | <b>Sepsis</b>              | <b>Sterile Inflammation</b> | <b><i>p</i></b> |
|--------------------|----------------------------|-----------------------------|-----------------|
| 30-day readmission | <b>24.3%</b> (20.4%-28.7%) | <b>24.3%</b> (20.7%-28.3%)  | 0.96            |
| 90-day readmission | <b>35.1%</b> (30.6%-39.8%) | <b>30.4%</b> (26.5%-34.6%)  | 0.12            |
| 1-year readmission | <b>54.1%</b> (49.3%-58.8%) | <b>47.2%</b> (42.8%-51.6%)  | 0.04            |

\*For the not currently hospitalized cohort, there is no index hospitalization. Thus, we report 30-day, 90-day, and 1-year admissions (not readmissions) from the time of matching.

**eTable G:** Top 5 terminal hospitalization diagnoses\* of patients with late mortality by matched cohorts

| <b>Sepsis (N=191)</b> |                           |            | <b>Not Currently Hospitalized (N=111)</b> |            |
|-----------------------|---------------------------|------------|-------------------------------------------|------------|
| 1                     | Sepsis                    | 34 (17.8%) | Sepsis                                    | 15 (13.5%) |
| 2                     | Pneumonia                 | 16 (8.4%)  | Acute Cerebrovascular Dz.                 | 11 (9.5%)  |
| 3                     | Respiratory Failure       | 13 (6.8%)  | Congestive Heart Failure                  | 8 (7.2%)   |
| 4                     | Aspiration Pneumonitis    | 10 (5.2%)  | Respiratory Failure                       | 8 (7.2%)   |
| 5                     | Acute Cerebrovascular Dz. | 8 (4.2%)   | Pneumonia                                 | 5 (4.5%)   |
|                       |                           |            | Acute Renal Failure                       | 5 (4.5%)   |

| <b>Sepsis (N=198)</b> |                          |            | <b>Non-Sepsis Infection (N=197)</b> |            |
|-----------------------|--------------------------|------------|-------------------------------------|------------|
| 1                     | Sepsis                   | 31 (15.7%) | Sepsis                              | 27 (13.7%) |
| 2                     | Pneumonia                | 15 (7.6%)  | Pneumonia                           | 19 (9.6%)  |
| 3                     | Respiratory Failure      | 14 (7.1%)  | Respiratory Failure                 | 14 (7.1%)  |
| 4                     | Congestive Heart Failure | 10 (5.1%)  | Congestive Heart Failure            | 13 (6.6%)  |
| 5                     | Aspiration Pneumonitis   | 9 (4.6%)   | Aspiration Pneumonitis              | 11 (6.0%)  |

| <b>Sepsis (N=129)</b> |                           |            | <b>Sterile Inflammation (N=104)</b> |            |
|-----------------------|---------------------------|------------|-------------------------------------|------------|
| 1                     | Sepsis                    | 27 (20.9%) | Pneumonia                           | 11 (10.6%) |
| 2                     | Pneumonia                 | 10 (7.8%)  | Congestive Heart Failure            | 10 (9.6%)  |
| 3                     | Respiratory Failure       | 9 (7.0%)   | Acute Cerebrovascular Dz.           | 7 (6.7%)   |
| 4                     | Aspiration Pneumonitis    | 6 (4.7%)   | Fluid and Electrolyte Disorders     | 7 (6.7%)   |
| 5                     | Acute Cerebrovascular Dz. | 5 (3.9%)   | Respiratory Failure                 | 6 (5.8%)   |
|                       |                           |            | Urinary Tract Infection             | 6 (5.8%)   |

\*Diagnosis categories determined using Health Care Cost and Utilization Project Single-Level Clinical Classification Software
